# Supplementary material
Source: publisher figshare collection journal article supplement (https://karger.figshare.com/articles/dataset/_/5126521)
Supplement: Supplementary file 1 [file 1]

**Supplementary Table 1.** Comparison between the infants retained and those lost to follow-up at corrected age 24 months

|  | **Retained infants**  **N = 4355** | **Lost infantsa**  **N = 1452** |
| --- | --- | --- |
| **Gestational age (week), mean (standard deviation)** | 27.9 (1.9) | 27.3 (2.0) |
| **Birth weight (g), mean (standard deviation)** | 1097.1 (233.4) | 1089.2 (235.3) |
| **Male, n (%)** | 2191 (50.3) | 719 (49.5) |
| **Vaginal delivery, n (%)** | 1733 (39.8) | 598 (41.2) |
| **Multiple births, n (%)** | 1036 (23.8) | 357 (24.7) |
| **Antepartum hemorrhage, n (%)** | 729 (17.5) | 218 (15.8) |
| **Premature rupture of membranes, n (%)** | 1519 (35.8) | 531 (37.6) |
| **Birth cardiopulmonary resuscitation, n (%)** | 511 (12.1) | 183 (13.2) |
| **Severe respiratory distress syndrome, n (%)** | 1891 (45.7) | 645 (46.8) |
| **Patent ductus arteriosus ligation, n (%)** | 335 (8.1) | 103 (7.4) |
| **Retinopathy of prematurity > stage III, n (%)** | 538 (12.5) | 157 (11.2) |
| **Chronic lung disease, n (%)** | 1340 (31.5) | 394 (28.5) |
| **Sepsis, n (%)** | 1179 (28.5) | 378 (27.6) |
| **Necrotizing enterocolitis > stage II, n (%)** | 198 (4.6) | 69 (4.9) |
| **Cystic periventricular leukomalacia, n (%)** | 176 (4.1) | 59 (4.3) |
| **Grade III/IV intraventricular hemorrhage, n (%)** | 245 (5.7) | 72 (5.2) |

Group differences were tested by chi-square analysis with categorical variables and t test with numerical variables.

aThe causes of loss to follow-up included parents’ refusal, and loss of contact due to changes of addresses or move out of town.

**Supplementary Table 2.** Effect modification by sepsis on cerebral palsy risk associated with three hypoxia/ischemia-related events in very preterm infants

|  | **Neuromotor outcome, n (%)** | | **Odds ratio (95% Confidence interval)** | |
| --- | --- | --- | --- | --- |
|  | Normal | Cerebral palsy | Unadjusted | Adjusteda |
| **No sepsis**  Birth CPR  no  yes  **Sepsis**  Birth CPR  no  yes | 1398 (66.7)  181 (8.6)  452 (21.6)  66 (3.1) | 220 (50.0)  72 (16.0)  121 (26.9)  36 (8.0) | 1  2.53 (2.01-3.19)  1.71 (1.25-2.35)  3.51 (2.12-4.14) | 1  1.98 (1.53-2.56)  1.47 (1.11-1.90)  3.18 (2.29-4.33) |
| **No sepsis**  PDA ligation  no  yes  **Sepsis**  PDA ligation  no  yes | 1488 (70.7)  74 (3.5)  496 (23.6)  48 (2.3) | 258 (56.5)  34 (7.4)  128 (28.0)  37 (8.1) | 1  2.60 (1.96-3.35)  1.47 (1.17-1.81)  4.36 (3.25-5.81) | 1  2.26 (1.62-3.01)  1.32 (1.02-1.66)  3.83 (2.72-5.28) |
| **No sepsis**  Chronic lung disease  no  yes  **Sepsis**  Chronic lung disease  no  yes | 1294 (58.9)  317 (14.4)  370 (16.8)  215 (9.8) | 168 (38.1)  108 (24.4)  70 (15.8)  96 (21.7) | 1  2.71 (2.00-3.66)  1.49 (1.18-1.90)  3.42 (2.50-4.69) | 1  2.15 (1.58-2.92)  1.41 (1.10-1.82)  3.25 (2.31-4.47) |

aAdjusted for gestational age, birth weight, sex, retinopathy of prematurity > stage III, grade III/IV intraventricular hemorrhage, and cystic periventricular leukomalacia. Abbreviations: CPR, cardiopulmonary resuscitation; PDA, patent ductus arteriosus.

**Supplementary** **Table 3.** Cumulative effects of sepsis and three hypoxia/ischemia-related events on the probabilities of cerebral palsy in very preterm infants

|  | **Observed Rates of Cerebral Palsy** | | **Predicted Probabilities of Cerebral Palsy** | |
| --- | --- | --- | --- | --- |
| **Predictor Events** | **No./Total (%)** | **95% Confidence Interval** | **Individual Event (%)** | **Event Count (%)** |
| **None**  **1 event**  BCPR  PDA ligation  CLD  Sepsis  Overall  **2 events**  BCPR + PDA ligation  BCPR + CLD  BCPR + Sepsis  PDA ligation + CLD  PDA ligation + Sepsis  CLD + Sepsis  Overall  **3 events**  BCPR + PDA ligation + CLD  BCPR + PDA ligation + Sepsis  BCPR+ CLD + Sepsis  PDA ligation + CLD + Sepsis  Overall  **4 events**  BCPR+PDA ligation +CLD+Sepsis | 120/1176 (10.2)  30/162 (18.5)  21/107 (19.6)  53/237 (22.4)  49/343 (14.3)  153/849 (18.0)  3/10 (30.0)  19/56 (33.9)  11/48 (22.9)  11/34 (32.4)  8/37 (21.6)  36/134 (26.9)  88/319 (27.6)  5/11 (45.5)  3/8 (37.5)  27/67 (40.3)  10/25 (40.0)  45/111 (40.5)  10/18 (55.6) | 8.5-11.9  12.5-24.5  12.1-27.2  17.1-27.7  10.6-18.0  15.4-20.6  1.6-58.4  21.5-46.3  11.0-34.8  16.6-48.1  8.4-34.9  19.4-34.4  22.7-32.5  16.0-74.9  4.0-71.0  28.6-52.0  20.8-59.2  31.4-49.7  32.6-78.5 | 10.1  16.9  18.4  20.1  12.9  16.4  29.1  31.4  21.2  33.6  23.0  25.0  26.4  48.0  35.2  37.8  40.1  39.2  55.0 | 10.0  16.7  26.7  40.0  54.7 |

Abbreviations: BCPR, birth cardiopulmonary resuscitation; PDA, patent ductus arteriosus; CLD, chronic lung disease
